# Supplementary material for: Evaporation/Decomposition Behavior of 1-Butyl-3-Methylimidazolium Chloride (BMImCL) Investigated through Effusion and Thermal Analysis Techniques
Source: MDPI journal article supplement (doi:10.3390/thermo3020015), 2023-04-24
Supplement: s1 [file s1]

# Evaporation/Decomposition Behavior of 1-Butyl-3-Methylimidazolium Chloride (BMImCl) Investigated through Effusion and Thermal Analysis Techniques

Bruno Brunetti <sup>1</sup>, Andrea Ciccio <sup>2\*</sup>, Guido Gigli <sup>2</sup>, Andrea Lapi <sup>2,3</sup>, Giulia Simonetti <sup>2</sup>, Elisa Toto <sup>4</sup>  
and Stefano Vecchio Cipriotti <sup>5</sup>

<sup>1</sup> Istituto per lo Studio dei Materiali Nanostrutturati, Consiglio Nazionale delle Ricerche, Dipartimento di Chimica, Università "La Sapienza" di Roma, P.le Aldo Moro 5, 00185 Rome, Italy; [bruno.brunetti@cnr.it](mailto:bruno.brunetti@cnr.it)

<sup>2</sup> Dipartimento di Chimica, Università "La Sapienza" di Roma, P.le A. Moro, 5, 00185 Rome, Italy; [guido.gigli@fondazione.uniroma1.it](mailto:guido.gigli@fondazione.uniroma1.it) (G.G.); [andrea.lapi@uniroma1.it](mailto:andrea.lapi@uniroma1.it) (A.L.); [simonetti.giulia89@gmail.com](mailto:simonetti.giulia89@gmail.com) (G.S.)

<sup>3</sup> Istituto per i Sistemi Biologici (ISB-CNR), Sede Secondaria di Roma-Meccanismi di Reazione, c/o Dipartimento di Chimica, Università "La Sapienza" di Roma, 00185 Rome, Italy

<sup>4</sup> Dipartimento di Ingegneria Chimica Materiali e Ambiente, Università "La Sapienza" di Roma, Via del Castro Laurenziano, 7, 00161 Rome, Italy; [elisa.toto@uniroma1.it](mailto:elisa.toto@uniroma1.it)

<sup>5</sup> Dipartimento di Scienze di Base ed Applicate per l'Ingegneria, Università "La Sapienza" di Roma, Via del Castro Laurenziano, 7, 00161 Rome, Italy

\* Correspondence: [andrea.ciccio@uniroma1.it](mailto:andrea.ciccio@uniroma1.it)

(a)

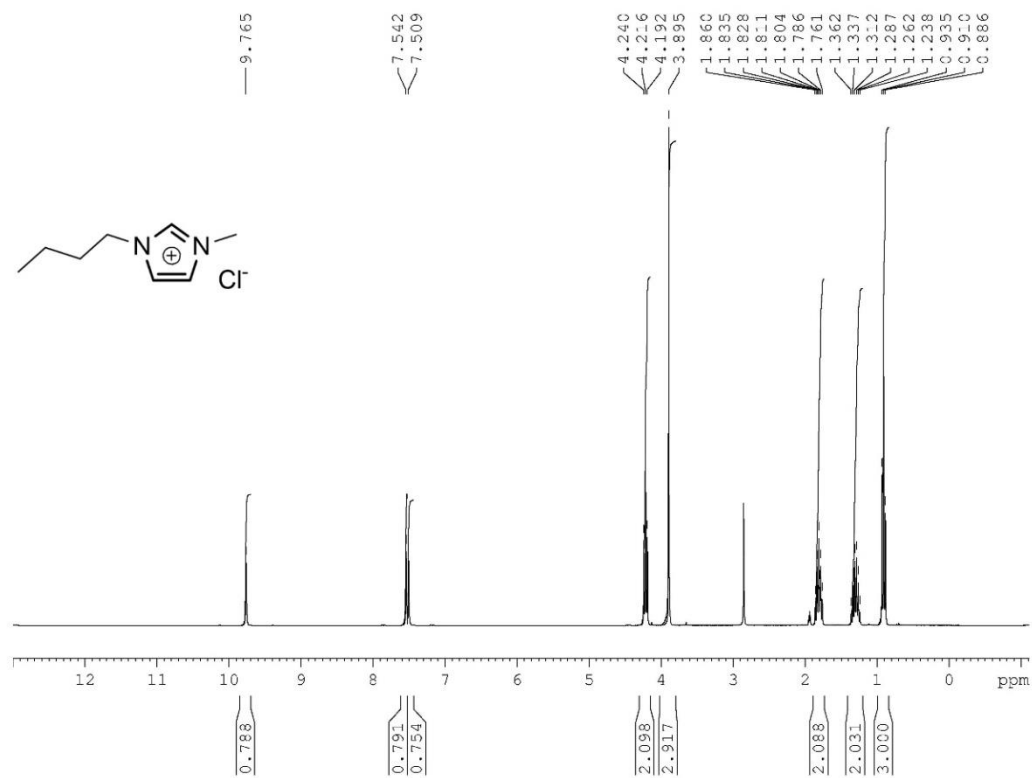

(b)

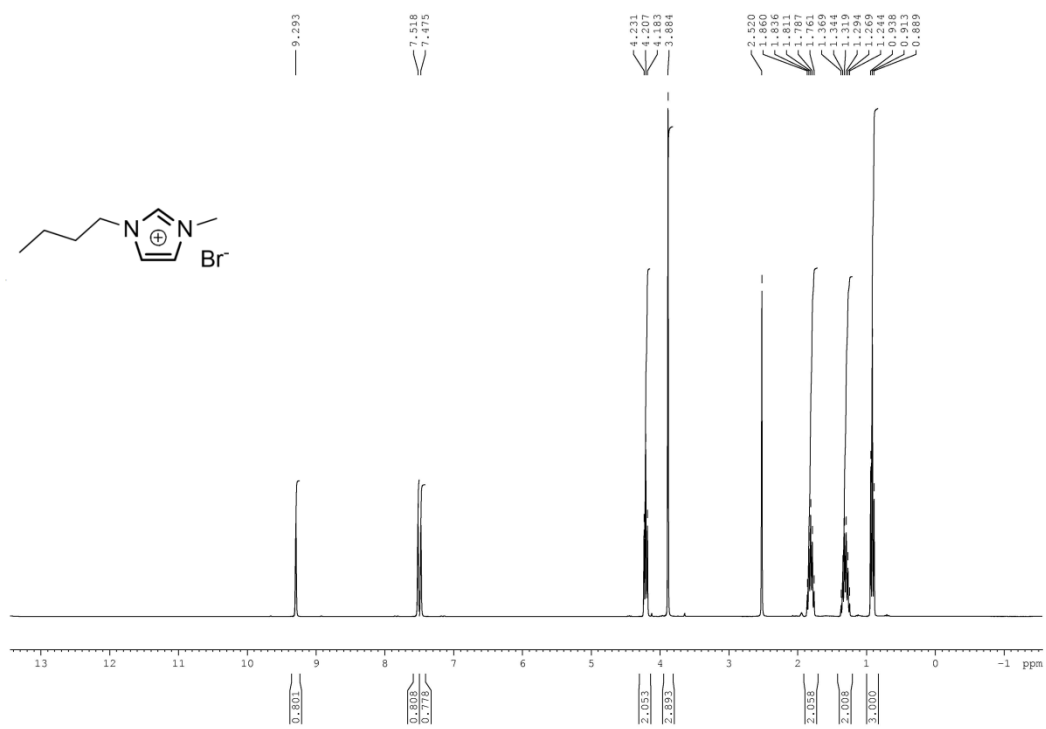

(c)

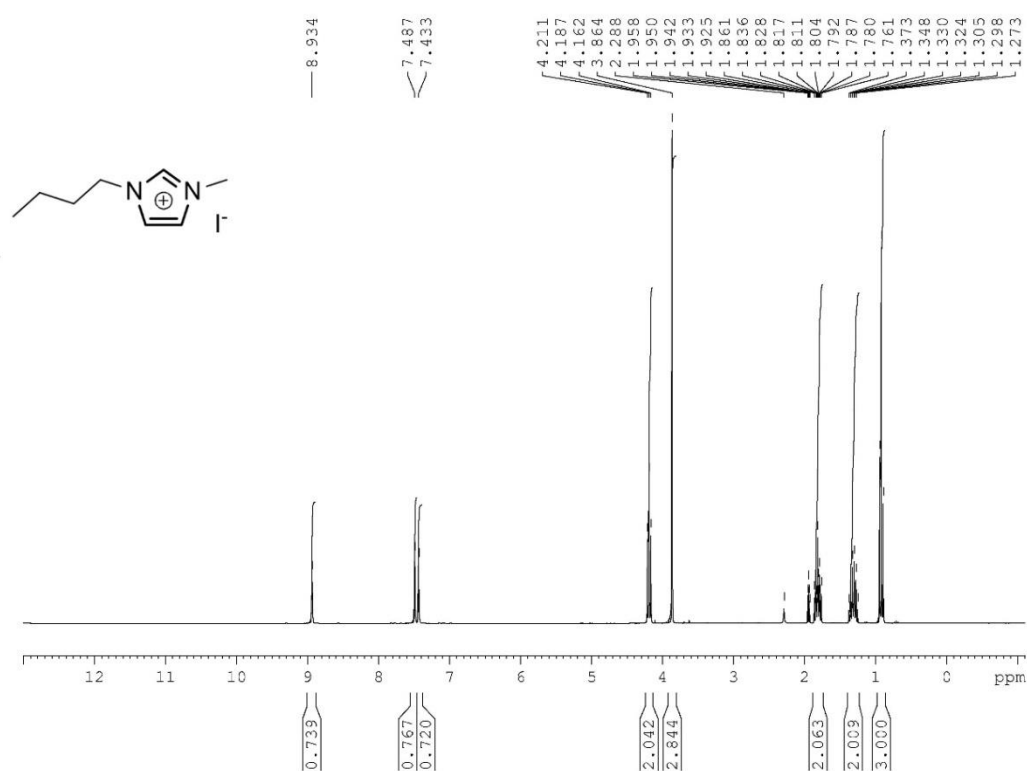

**Figure S1.** <sup>1</sup>H NMR spectra of (a) BMImCl, (b) BMImBr, (c) BMImI (300 MHz, CD<sub>3</sub>CN).
